RESEARCH ARTICLE

# Relationship between Eating Disturbance and Dementia Severity in Patients with Alzheimer's Disease

Kyoko Kai<sup>1,3</sup>, Mamoru Hashimoto<sup>2</sup>, Koichiro Amano<sup>3</sup>, Hibiki Tanaka<sup>1</sup>, Ryuji Fukuhara<sup>2</sup>, Manabu Ikeda<sup>2\*</sup>

**1** Department of Neuropsychiatry, Graduate School of Medical Science, Kumamoto University, Kumamoto, Japan, **2** Department of Neuropsychiatry, Faculty of Life Sciences, Kumamoto University, Kumamoto, Japan, **3** Department of Psychiatry, Nozaki Hospital, Miyazaki, Japan

\* [mikeda@kumamoto-u.ac.jp](mailto:mikeda@kumamoto-u.ac.jp)

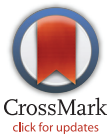

OPEN ACCESS

**Citation:** Kai K, Hashimoto M, Amano K, Tanaka H, Fukuhara R, Ikeda M (2015) Relationship between Eating Disturbance and Dementia Severity in Patients with Alzheimer's Disease. PLoS ONE 10(8): e0133666. doi:10.1371/journal.pone.0133666

**Editor:** Stephen D Ginsberg, Nathan Kline Institute and New York University School of Medicine, UNITED STATES

**Received:** December 19, 2014

**Accepted:** June 30, 2015

**Published:** August 12, 2015

**Copyright:** © 2015 Kai et al. This is an open access article distributed under the terms of the [Creative Commons Attribution License](https://creativecommons.org/licenses/by/4.0/), which permits unrestricted use, distribution, and reproduction in any medium, provided the original author and source are credited.

**Data Availability Statement:** Data are available from Nozaki Hospital Data Access/ Ethics Committee for researchers who meet the criteria for access to confidential data. Data from Nozaki Hospital is managed by Kumamoto University. The address and telephone number of Nozaki Hospital for data requests are in the manuscript.

**Funding:** This work was supported by the Ministry of Health, Labour, and Welfare (Grant No.23591718, [www.mhlw.go.jp](http://www.mhlw.go.jp)) and the Ministry of Education, Culture, Sports, Science and Technology (Grant No.24249100, [www.mext.go.jp](http://www.mext.go.jp)).

## Abstract

### Background

Eating is one of the most important daily activities in managing patients with dementia. Although various eating disturbance occur as dementia progresses, to our knowledge, most of the studies focused on a part of eating disturbance such as swallowing and appetite. There have been few comprehensive studies including eating habits and food preference in patients with Alzheimer's disease (AD). The aims of this study were to investigate almost all eating disturbance and to examine the relationship of eating disturbance to dementia stage in AD.

### Methods

A total of 220 patients with AD and 30 normal elderly (NE) subjects were recruited. Eating disturbance was assessed by a comprehensive questionnaire that had been previously validated. Potential relationships between the characteristics of eating disturbance and dementia stage as classified by the Clinical Dementia Rating (CDR) were assessed.

### Results

Overall, 81.4% of patients with AD showed some eating and swallowing disturbance, whereas only 26.7% of the NE subjects had such a disturbance. Even in an early stage, patients with AD had many types of eating disturbance; "Appetite change" was shown in nearly half of the mild AD patients (49.5%). In the moderate stage, the scores of "change of eating habits and food preference" were highest, and in the severe stage "swallowing disturbance" became critical.

### Conclusion

In AD, the relationship of dementia stage to eating disturbance differs according to the type of eating disturbance. The relationships between various eating disturbance and the severity of dementia should be considered.

**Competing Interests:** The authors have declared that no competing interests exist.

## Introduction

Eating is essential to life and is one of the most important daily activities for managing patients with dementia. In caring for patients with dementia, eating takes up as large a share as help with bathing and toilet support. It is well known that various eating disturbance occur with dementia progression, including “swallowing disturbance”, “change of appetite”, “change of eating habits”, “consumption of inedible objects” and so on. These symptoms are thought to be modulated by many factors including cognitive dysfunction, psychiatric and neurological symptoms, and decline of daily activity in individuals with dementia [1,2,3,4,5]. Despite the importance of the disturbance, there have been few systematic studies of eating disturbance compared with the other behavioral and psychological symptoms of dementia (BPSD) like hallucination and delusions.

Several studies have reported that different types of dementia present with characteristic behavioral profiles reflecting the specific brain regions affected. Furthermore, recent studies have found that the features of BPSD might be influenced by dementia stage [6,7,8]. With regard to eating and swallowing disturbance, characteristics of the symptoms in each dementia are getting clear. Patients with Alzheimer’s disease (AD) sometimes suffer loss of appetite and decrease their body weight [9,10]. Some patients with vascular dementia (VaD) have pseudo-bulbar palsy resulting in difficulty swallowing and have a high risk of aspiration pneumonia [11,12,13,14]. Patients with dementia with Lewy bodies (DLB) have difficulty swallowing and loss of appetite [4]. Patients with frontotemporal dementia (FTD) and semantic dementia (SD) increase in appetite, come to prefer sweet and strong foods, and want to eat the same foods repeatedly [3,15]. However, most of the studies focused on a part of eating disturbance such as swallowing and appetite. There have been few comprehensive studies including eating habits and food preference in patients with AD.

The aims of this study were to investigate almost all eating disturbance and to reveal the relationship between dementia stage and characteristics of eating disturbance in patients with AD.

## Materials and Methods

### Ethics Statement

Before the study, a research plan was composed and put forward to the Ethics Committee of Kumamoto University School of Medicine, which was a typical comprehensive university in Japan, for reviewal and approval. All procedures for the present study strictly followed the 2011 Clinical Study Guidelines of the Ethics Committee of Kumamoto University Hospital and were approved by the Internal Review Board. After a complete description of the study was presented, informed written consent was obtained from patients and their caregivers in compliance with the research standards for human research for all participating institutions and in accordance with the Helsinki Declaration.

### Subjects

This study was a prospective hospital-based cohort study. A total of 220 outpatients were selected according to the following inclusion/exclusion criteria from a consecutive series of 407 patients with dementia who attended the memory clinic of Nozaki Hospital, which is a psychiatric hospital, from April 2012 to June 2013. Among them, 60 were men and 160 women. All individuals were examined by senior neuropsychiatrists (K.K. and K.A.) using routine laboratory tests, standard neuropsychological examinations such as Mini-Mental State Examination (MMSE) [16] and brain magnetic resonance imaging (MRI) or brain computed tomography

(CT). The inclusion criterion in the present study was fulfilling the National Institute for Neurological and Communicative Disorders and Stroke and the Alzheimer's Disease and Related Disorders Association for probable AD [17]. The following patients were excluded from the current study: (1) those without a reliable informant; (2) those with developmental abnormalities, serious psychiatric diseases such as schizophrenia and major depression, or substance abuse before the onset of dementia, or significant neurologic antecedents, such as brain trauma, brain tumor, epilepsy, and inflammatory disease; (3) those complicated by an unstable physical illness, such as diabetes mellitus or malignant diseases, that would influence their eating behavior, and (4) those unable to provide informed consent.

Thirty normal elderly subjects (NE subjects) age-matched to patients were recruited from the community (12 male and 18 female). They showed normal cognitive functions (25 or above on the MMSE), normal findings in the physical and neurologic examinations, no history of psychiatric disorders, and no risk factors for cerebrovascular disease (hypertension, heart disease, and diabetes mellitus).

## Measurement

The severity of dementia was rated by using the Clinical Dementia Rating (CDR) [18], of which the scores range between 0 (no cognitive decline), 0.5 (questionable dementia), 1 (mild dementia), 2 (moderate dementia) and 3 (severe dementia). In this study, CDR 0.5 and CDR 1 patients were assigned to one group during the analysis and we considered these patients as having mild dementia. Thus, we compared eating problems between four groups; "mild dementia (CDR 0.5 and 1,  $n = 99$ )", "moderate dementia (CDR 2,  $n = 63$ )", "severe dementia (CDR 3,  $n = 58$ )", and NE subjects ( $n = 30$ ) groups.

To assess the characteristics of eating disturbance of AD patients, we used a comprehensive questionnaire that had been originally designed to assess eating disturbance in patients with dementia [3]. This caregiver-based questionnaire consisted of 37 items investigating the following five domains: 1) swallowing, 2) appetite, 3) food preference including sweet food preference and food fads, 4) eating habits including stereotypic eating behaviors and decline in table manners, and 5) other oral behaviors including food cramming and indiscriminate eating (Table 1). It was emphasized that a "symptom" should reflect a substantive change from a patient's pre-morbid state and evaluated states for the latest month. If caregivers endorsed a particular item, they were asked to rate the frequency (1 = occasionally, less than once per week; 2 = often, about once per week; 3 = frequently, several times per week but less than every day; 4 = very frequently, once or more per day or continuously); and severity (1 = mild, easily controlled; 2 = moderate, not easily controlled; 3 = marked, embarrassing or otherwise disturbing to the family), to derive a product scores (frequency  $\times$  severity). The questionnaire was administered by a single rater (K.K.).

## Statistical analyses

To compare the rates of each domain (swallowing, appetite, food preference, eating habits, and other oral behaviors) between the 4 groups, we used  $\chi^2$ -test with Fisher's exact probability test and residual analysis using Bonferroni z-test for each comparison when an overall group difference was significant. If a patient had any symptom, we regarded positive in that domain. In the domain of "change of appetite", "loss of appetite" and "increase in appetite" were analyzed separately because of the possibility of different neural bases of the two symptoms [19,20]. Additionally, the score (frequency  $\times$  severity) of each domain represented by the total score within each domain was compared between the four groups using one-way analysis of variance (ANOVA) followed by a post-hoc Sidak test. A significance level of 0.05 was set for all analyses.

**Table 1. Symptoms of eating/swallowing disturbance for each domain in the questionnaire.**

|                                             |                                                |
|---------------------------------------------|------------------------------------------------|
| <b>Swallowing disturbance</b>               | Difficulty in swallowing food                  |
|                                             | Difficulty in swallowing liquids               |
|                                             | Coughing or choking when swallowing            |
|                                             | Taking a long time to swallow                  |
|                                             | Placing food in mouth but not chewing it       |
|                                             | Chewing food but not swallowing it             |
| <b>Appetite change</b>                      | Loss of appetite                               |
|                                             | Increase in appetite                           |
|                                             | Seeking out food between meals                 |
|                                             | Overeating at meal time                        |
|                                             | Requesting more food                           |
|                                             | Reporting hunger                               |
|                                             | Reporting being overfull                       |
|                                             | Other change about appetite                    |
| <b>Food preference</b>                      | Needs to limit food                            |
|                                             | Preferring sweet foods more than before        |
|                                             | Drinking more soft or sweet drinks             |
|                                             | Drinking more tea/coffee or water              |
|                                             | "Taste" in food changed in some way            |
|                                             | Adding more seasoning to their food            |
|                                             | Developing other food fads                     |
|                                             | Hoarding foods                                 |
| <b>Eating habits</b>                        | Drinking more alcohol                          |
|                                             | Wanting to cook or eat the same food every day |
|                                             | Tending to eat foods in the same order         |
|                                             | Wanting to eat at the same time every day      |
|                                             | Decline in table manners                       |
|                                             | Eating with hands                              |
|                                             | Other change about food preference             |
| <b>Other eating behaviors</b>               | Taking a long time to eat                      |
|                                             | Tending to overfill mouth                      |
|                                             | Chewing or sucking without trying to eat       |
|                                             | Eating non-edible foodstuffs                   |
|                                             | Tending to snatch or grasp any food items      |
|                                             | Becoming a heavier smoker or taking up smoking |
|                                             | Episodes of vomiting naturally                 |
| Episodes of vomiting by using their fingers |                                                |

doi:10.1371/journal.pone.0133666.t001

All statistical analyses were performed using IBM SPSS Statistics 21 (IBM Japan, Tokyo, Japan).

## Results

Demographic variables of the four groups are summarized in [Table 2](#). There was a significant difference in sex and age. Of the 220 AD patients, 179 (81.4%) patients showed some eating disturbance. [Fig 1](#) shows the rates of eating disturbance in each of the four groups.

[Table 3](#) shows the rates of each eating domain in the three patient groups and in NE subjects. Significant group differences were observed for the rates of all domains except for "loss of

Table 2. Demographics of participants.

|                  | NE SUBJECTS (n = 30) | MILD (CDR 0.5 & 1) (n = 99) | MODERATE (CDR 2) (n = 63) | SEVERE (CDR 3) (n = 58) | All (n = 220) | P-VALUE             |
|------------------|----------------------|-----------------------------|---------------------------|-------------------------|---------------|---------------------|
| Male/female      | 12 / 18              | 28 / 71                     | 15 / 48                   | 17 / 41                 | 60 / 160      | 0.458 <sup>a</sup>  |
| Age (years)      | 80.1 ± 5.0           | 80.4 ± 6.4                  | 82.1 ± 5.7                | 83.1 ± 5.6              | 81.6 ± 6.1    | 0.019 <sup>b</sup>  |
| MMSE             | 27.3 ± 2.0           | 21.6 ± 2.8                  | 16.7 ± 4.1                | 9.9 ± 5.6               | 17.1 ± 6.3    | <0.001 <sup>b</sup> |
| Disease duration |                      | 2.5±1.9                     | 4.7±2.8                   | 7.1±3.8                 | 4.3±3.4       |                     |

Notes: Values are n or mean ± SD.

NE: normal elderly; MMSE: Mini-Mental State Examination; CDR: Clinical Dementia Rating.

<sup>a</sup>χ<sup>2</sup> test

<sup>b</sup>ANOVA

doi:10.1371/journal.pone.0133666.t002

appetite” ( $p = 0.153$ ). Z tests showed that the rates of “appetite change” ( $p < 0.001$ ), “food preference” ( $p < 0.001$ ) and “eating habit” ( $p < 0.001$ ) domains was significantly higher in the three patient groups than in the NE subjects group. The rates of “swallowing disturbance” and “other eating behaviors” domains were significantly higher in the severe group than in any other group.

Table 4 shows the score of each eating domain. The score of all eating domains except for the “loss of appetite” increased with dementia severity, similar to the rates. It was noteworthy that the score of the “Food preference” domain in the moderate stage was significantly higher ( $p = 0.002$ ) than in the severe one.

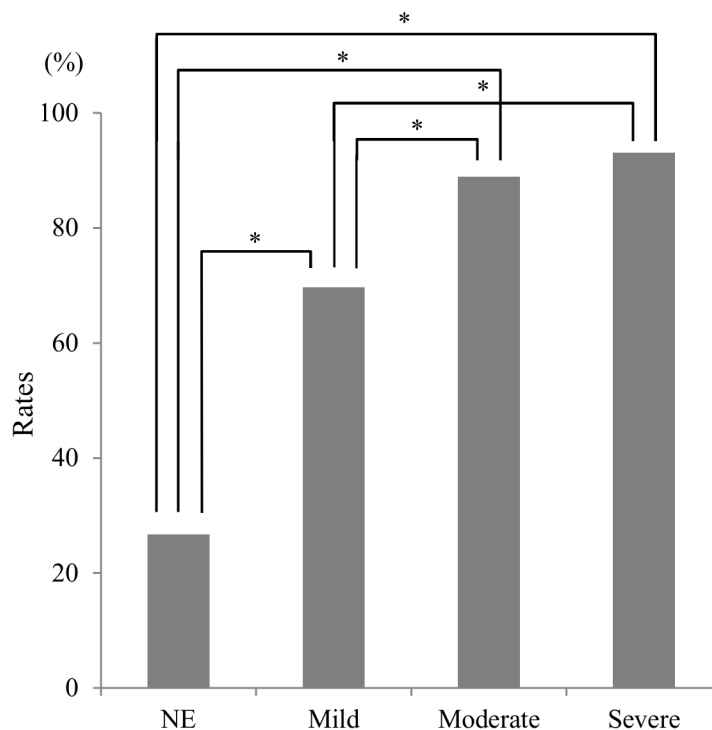

Fig 1. Rates of eating and swallowing disturbance in each stage of dementia and NE subjects. NE: normal elderly; \*: An asterisk shows  $p < 0.05$  with Bonferroni correction.

doi:10.1371/journal.pone.0133666.g001

**Table 3. Rates of disturbance in each domain for the subject groups.**

|                        | NE<br>SUBJECTS<br>(n = 30) | MILD<br>(CDR 0.5 & 1)<br>(n = 99) | MODERATE<br>(CDR 2)<br>(n = 63) | SEVERE<br>(CDR 3)<br>(n = 58) | P-VALUE | Z TEST WITH BONFERRONI CORRECTION            |
|------------------------|----------------------------|-----------------------------------|---------------------------------|-------------------------------|---------|----------------------------------------------|
| Swallowing disturbance | 16.7%                      | 22.2%                             | 28.6%                           | 53.4%                         | < 0.001 | NE, Mild, Moderate < Severe                  |
| Appetite change        | 13.3%                      | 49.5%                             | 58.7%                           | 77.6%                         | < 0.001 | NE < Mild, Moderate, Severe; Mild < Severe   |
| Loss of appetite       | 13.3%                      | 28.3%                             | 22.2%                           | 34.5%                         | 0.153   |                                              |
| Increase in appetite   | 0.0%                       | 27.3%                             | 39.7%                           | 48.3%                         | < 0.001 | NE < Mild, Moderate, Severe; Mild < Severe   |
| Food preference        | 6.7%                       | 36.4%                             | 47.6%                           | 46.6%                         | < 0.001 | NE < Mild, Moderate, Severe                  |
| Eating habits          | 0.0%                       | 38.4%                             | 60.3%                           | 58.6%                         | < 0.001 | NE < Mild, Moderate, Severe; Mild < Moderate |
| Other eating behaviors | 0.0%                       | 9.1%                              | 15.9%                           | 37.9%                         | < 0.001 | NE, Mild, Moderate < Severe                  |

Note: NE: normal elderly; CDR: Clinical Dementia Rating.

doi:10.1371/journal.pone.0133666.t003

## Discussion

In this study, we examined eating disturbance in a large (n = 220) sample of patients with AD. To our knowledge, this is the first study that used a single, previously validated questionnaire to evaluate eating disturbance in AD in relation to dementia severity.

The most remarkable finding was the fact that as many as 81.4% patients with AD showed some eating disturbance, whereas only 26.7% of the NE subjects had disturbance. The rates of eating disturbance, assessed by using Neuropsychiatric Inventory (NPI), in patients with AD was previously reported as 23.5% to 51.6% [8,21]. The higher rates of our study might be due to the sensitivity of our assessment tool. The large difference in rates between patients with AD and the NE subjects demonstrates the significance of eating disturbance for managing patients with AD.

Previously, it was reported that the rates of all symptoms in NPI increased along the severity of the disease, except for sleep and eating disturbance [22]. They showed that the rates of “eating disturbance” was 24.5% in moderate-severe AD, 15.2% in mild AD, 19.8% in Mild Cognitive Impairment, and 6% in controls and no significant differences were found among the groups. In the present study, “increase in appetite”, “swallowing disturbance” and “other eating behaviors” increased in proportion to severity of dementia. On the other hand, the score of “food preference” and “eating habits” became highest in the moderate stage and declined

**Table 4. Scores for each eating/swallowing domain in the four subject groups.**

|                        | NE<br>SUBJECTS<br>(n = 30) | MILD<br>(CDR 0.5 & 1)<br>(n = 99) | MODERATE<br>(CDR 2)<br>(n = 63) | SEVERE<br>(CDR 3)<br>(n = 58) | P-VALUE | POST HOC SIDAK TEST                    |
|------------------------|----------------------------|-----------------------------------|---------------------------------|-------------------------------|---------|----------------------------------------|
| Swallowing disturbance | 0.17 ± 0.4                 | 1.36 ± 6.5                        | 2.98 ± 9.8                      | 5.22 ± 8.8                    | 0.007   | NE, Mild < Severe                      |
| Appetite change        | 0.13 ± 0.4                 | 3.24 ± 4.7                        | 7.10 ± 12.7                     | 5.71 ± 7.6                    | < 0.001 | NE < Moderate, Severe; Mild < Moderate |
| Loss of appetite       | 0.13 ± 0.4                 | 1.53 ± 3.1                        | 1.52 ± 4.0                      | 2.17 ± 3.9                    | 0.069   |                                        |
| Increase in appetite   | 0.00 ± 0.0                 | 1.73 ± 4.1                        | 5.57 ± 12.1                     | 3.53 ± 7.4                    | 0.002   | NE, Mild < Moderate                    |
| Food preference        | 0.07 ± 0.3                 | 2.31 ± 5.3                        | 5.10 ± 10.1                     | 2.00 ± 3.6                    | 0.002   | NE, Mild < Moderate; Severe < Moderate |
| Eating habits          | 0.00 ± 0.0                 | 2.30 ± 4.6                        | 6.44 ± 9.4                      | 4.81 ± 6.4                    | < 0.001 | NE < Moderate, Severe; Mild < Moderate |
| Other eating behaviors | 0.00 ± 0.0                 | 1.34 ± 0.7                        | 0.70 ± 2.34                     | 1.66 ± 3.2                    | < 0.001 | NE, Mild < Severe                      |

Notes: Values are mean ± SD.

NE: normal elderly; CDR: Clinical Dementia Rating.

doi:10.1371/journal.pone.0133666.t004

afterward. The relationship of dementia stage should be different among the domains of eating disturbance.

Patients with AD in the mild stage have been reported to show few eating disturbance, similar to the neurologic manifestations [3,4,5,15]. However, in the present study, patients with AD had many types of eating disturbance even in an early stage. Especially, “appetite change” was shown in nearly half of the mild patients with AD (49.5%). The difference might be partially explained by sampling bias. Subjects in the previous studies were from the memory clinic in a university hospital while those in this study were from the memory clinic in a psychiatric hospital. Weight loss and low body weight have been commonly reported in AD. Furthermore, a recent longitudinal study, involving community-dwelling elderly, found that participants with incident dementia or MCI had accelerated weight loss from as early as 6 years before diagnosis of AD [23]. In the present study the rates of “loss of appetite” was about twice as high in each severity group of AD as in the NE subjects group although the difference between patients with AD and NE subjects did not reach the significance level. We should consider the importance of “loss of appetite” in all severity stages of AD patients. It was interesting that two conflicting eating symptoms, “increase in appetite” and “loss of appetite”, were observed in approximately the same number of patients with mild AD. Although fundamental pathophysiological mechanism for “appetite change” is unclear, this condition might reflect different neuropsychological and neuropsychiatric symptoms associated with AD. Appetite loss is well known as being a main symptom of depression and as many as 68.0% patients with AD were reported to have some depressive symptoms [24]. There was a possibility that depression might be concerned about “loss of appetite”. On the other hand, “increase in appetite” might reflect the behavior of having a meal in a repetitive manner because of severe memory impairment. We need to do a longitudinal study for revealing whether a case of “loss of appetite” converts to a case of “increase in appetite”.

In the mild stage, over one-third of patients showed changes in “food preference” and “eating habits”. The score of “food preference”, “eating habits”, “appetite change” and “increase in appetite” became highest in the moderate stage and declined afterward even if some are not statistically significant. It may reflect some sort of ‘burnout’ leading to increased behavioral apathy. These eating behaviors may require a certain level of functional ability in patients with AD. The details of “food preference” were changing to prefer sweet foods and candies, and adding strong flavor to their dishes using soy sauces. It is not clear yet whether the gustatory function is impaired in patients with AD. Previous research reported that the gustatory function of patients with AD was not impaired [25,26]. On the other hand, Steinbach et al. (2010) investigated the gustatory recognition threshold in mild AD patients, MCI patients, and normal elderly subjects using an actual taste test, and they showed the impairment of gustatory recognition for all four basic tastes in the patient group, even at the MCI stage [27]. Although the present study did not make a direct examination of gustatory function of patients with AD, our results may indicate the possible presence of gustatory dysfunction in mild AD in an indirect fashion.

“Swallowing disturbance” was critical in the severe stage AD. Humbert et al. investigated the relationship between swallowing disturbance and severity of dementia, and they found that there were a few patients with AD who showed swallowing disturbance in their mild or moderate stage, and more patients presented with this symptom as dementia progressed [28]. In the current study, approximately half of the patients in the severe stage had developed swallowing disturbance, which was lower than we expected. We thought that this might be due to the fact that some of our patients with swallowing disturbance had already been taken care by professional caregivers or the nursing staff in a daycare unit using a thick liquid and minced food.



There are a few methodological issues that should be taken into consideration when interpreting our results. First, the diagnosis relied solely on clinical basis without histopathologic confirmation, with inevitably some uncertainty about the rate of misclassification. Secondly, we did not consider the influence of other neuropsychiatric symptoms and neuropsychotropic drugs such as neuroleptics, SSRIs, SNRIs, and cholinesterase inhibitors. These symptoms and drugs might have some effects of changing appetite and swallowing disturbance. Thirdly, due to the cross-sectional study design, the relationship between the severity of dementia and eating disturbance could only be hypothesized. It remains an open question whether “loss of appetite” and “increase in appetite” shift relative to each other in the same patient with disease progression or if the two conditions are shown in different patients. Longitudinal research may offer additional information on the development and course of eating disturbance in patients with AD.

## Conclusion

The present findings indicated the importance of paying attention to various eating disturbance corresponding to the severity of dementia. With foresight, caregivers can handle eating disturbance in AD when the characteristics and longitudinal changes are revealed.

## Supporting Information

**S1 Table. Data of this study including values and statistical results.**  
(XLSX)

## Acknowledgments

The authors would like to thank all of the subjects and caregivers for their participation. This study was supported by grants provided by the Ministry of Health, Labour, and Welfare (Dementia-General-003) for M.I. and by the Ministry of Education, Culture, Sports, Science and Technology (Grant No. 23591718, No. 24249100) for M.I.

## Author Contributions

Conceived and designed the experiments: MI. Performed the experiments: KK. Analyzed the data: KK. Wrote the paper: KK MI MH RF. Collected the data: KA HT.

## References

1. Frisconi GB, Franzoni S, Bellelli G, Morris J, Warden V. Overcoming eating difficulties in the severely demented. In: Volicer L, Hurley A, editors. *Hospice Care for Patients with Advanced Progressive Dementia*. New York: Springer Publishing Company; 1998. pp. 48–67.
2. Holm B, Söderhamn O. Factors associated with nutritional status in a group of people in an early stage of dementia. *Clin Nutr*. 2003; 22(4): 385–9. PMID: [12880606](#)
3. Ikeda M, Brown J, Holland AJ, Fukuhara R, Hodges JR. Changes in appetite, food preference, and eating habits in frontotemporal dementia and Alzheimer's disease. *J Neurol Neurosurg Psychiatry*. 2002; 73(4): 371–6. PMID: [12235302](#); PubMed Central PMCID: PMC1738075
4. Shinagawa S, Ikeda M, Nestor PJ, Shigenobu K, Fukuhara R, Nomura M, et al. Characteristics of abnormal eating behaviours in frontotemporal lobar degeneration: a cross-cultural survey. *J Neurol Neurosurg Psychiatry*. 2009; 80(12): 1413–4. doi: [10.1136/jnnp.2008.165332](#) PMID: [19917828](#)
5. Shinagawa S, Ikeda M, Nestor PJ, Shigenobu K, Fukuhara R, Nomura M, et al. Characteristics of abnormal eating behaviours in frontotemporal lobar degeneration: a cross-cultural survey. *J Neurol Neurosurg Psychiatry* 2009; 80: 1413–4. doi: [10.1136/jnnp.2008.165332](#) PMID: [19917828](#)
6. Harwood DG, Barker WW, Ownby RL, Duara R. Relationship of behavioral and psychological symptoms to cognitive impairment and functional status in Alzheimer's disease. *Int J Geriatr Psychiatry*. 2000; 15(5): 393–400. PMID: [10822237](#)



7. Srikanth S, Nagaraja AV, Ratnavalli E. Neuropsychiatric symptoms in dementia-frequency, relationship to dementia severity and comparison in Alzheimer's disease, vascular dementia and frontotemporal dementia. *J Neurol Sci.* 2005; 236(1–2): 43–8. doi: [10.1016/j.jns.2005.04.014](https://doi.org/10.1016/j.jns.2005.04.014) PMID: [15964021](https://pubmed.ncbi.nlm.nih.gov/15964021/)
8. Taameeyapradit U, Udomittipong D, Tepparak N. Characteristics of behavioral and psychological symptoms of dementia, severity and levels of distress on caregivers. *J Med Assoc Thai.* 2014; 97(4): 423–30. PMID: [24964685](https://pubmed.ncbi.nlm.nih.gov/24964685/)
9. Grundman M, Corey-Bloom J, Jernigan T, Archibald S, Thal LJ. Low body weight in Alzheimer's disease is associated with mesial temporal cortex atrophy. *Neurology.* 1996; 46(6): 1585–91. PMID: [8649553](https://pubmed.ncbi.nlm.nih.gov/8649553/)
10. Hu X, Okamura N, Arai H, Higuchi M, Maruyama M, Itoh M, et al. Neuroanatomical correlates of low body weight in Alzheimer's disease: a PET study. *Prog Neuropsychopharmacol Biol Psychiatry.* 2002; 26(7–8): 1285–9. PMID: [12502015](https://pubmed.ncbi.nlm.nih.gov/12502015/)
11. Edahiro A, Hirano H, Yamada R, Chiba Y, Watanabe Y. [Comparative study of eating behavior in elderly patients with Alzheimer's disease and vascular dementia: a first report.—Comparison of disturbed eating behavior—]. *Nihon Ronen Igakkai Zasshi.* 2013; 50(5): 651–60. PMID: [24622139](https://pubmed.ncbi.nlm.nih.gov/24622139/)
12. Enomoto R, Kikutani T, Suzuki A, Inaba S. [Relationship between eating dysfunction and life span and mortality in institutionalized elderly people]. *Nihon Ronen Igakkai Zasshi.* 2007; 44(1): 95–101. PMID: [17337861](https://pubmed.ncbi.nlm.nih.gov/17337861/)
13. Igoumenou A, Ebmeier KP. Diagnosing and managing vascular dementia. *Practitioner* 2012; 256(1747): 13–16. PMID: [22720454](https://pubmed.ncbi.nlm.nih.gov/22720454/)
14. Iwamoto T. [Cerebrovascular diseases in the elderly on a geriatric viewpoint]. *Nihon Ronen Igakkai Zasshi.* 2011; 48(5): 466–74. PMID: [22323019](https://pubmed.ncbi.nlm.nih.gov/22323019/)
15. Bozeat S, Gregory CA, Ralph MA, Hodges JR. Which neuropsychiatric and behavioural features distinguish frontal and temporal variants of frontotemporal dementia from Alzheimer's disease? *J Neurol Neurosurg Psychiatry.* 2000; 69(2): 178–86. PMID: [10896690](https://pubmed.ncbi.nlm.nih.gov/10896690/); PubMed Central PMCID: PMCPMC1737062
16. Folstein MF, Folstein SE, McHugh PR. "Mini-mental state". A practical method for grading the cognitive state of patients for the clinician. *J Psychiatr Res.* 1975; 12(3): 189–98. PMID: [1202204](https://pubmed.ncbi.nlm.nih.gov/1202204/)
17. McKhann G, Drachman D, Folstein M, Katzman R, Price D, Stadlan EM. Clinical diagnosis of Alzheimer's disease: report of the NINCDS-ADRDA Work Group under the auspices of Department of Health and Human Services Task Force on Alzheimer's Disease. *Neurology.* 1984; 34(7): 939–44. PMID: [6610841](https://pubmed.ncbi.nlm.nih.gov/6610841/)
18. Hughes CP, Berg L, Danziger WL, Coben LA, Martin RL. A new clinical scale for the staging of dementia. *Br J Psychiatry.* 1982; 140: 566–72. PMID: [7104545](https://pubmed.ncbi.nlm.nih.gov/7104545/)
19. Farooqi IS. Defining the neural basis of appetite and obesity: from genes to behaviour. *Clin Med.* 2014; 14(3): 286–9. doi: [10.7861/clinmedicine.14-3-286](https://doi.org/10.7861/clinmedicine.14-3-286) PMID: [24889574](https://pubmed.ncbi.nlm.nih.gov/24889574/)
20. Matthew E, Marta E, Larry S, Richard D. Genetic identification of a neural circuit that suppresses appetite. *Nature.* 2013; 530: 111–114.
21. Chareemboon T, Phanasathit M. Prevalence of neuropsychiatric symptoms in Alzheimer's disease: a cross-sectional descriptive study in Thailand. *J Med Assoc Thai.* 2014; 97(5): 560–5. PMID: [25065098](https://pubmed.ncbi.nlm.nih.gov/25065098/)
22. M FM, Molano A, Castro J, Zarranz JJ. Prevalence of neuropsychiatric symptoms in mild cognitive impairment and Alzheimer's disease, and its relationship with cognitive impairment. *Curr Alzheimer Res.* 2010; 7(6): 517–26. PMID: [20455862](https://pubmed.ncbi.nlm.nih.gov/20455862/)
23. Gao S, Nguyen JT, Hendrie HC, Unverzagt FW, Hake A, Smith-Gamble V, et al. Accelerated weight loss and incident dementia in an elderly African-American cohort. *J Am Geriatr Soc.* 2011; 59(1): 18–25. doi: [10.1111/j.1532-5415.2010.03169.x](https://doi.org/10.1111/j.1532-5415.2010.03169.x) PMID: [21054328](https://pubmed.ncbi.nlm.nih.gov/21054328/); PubMed Central PMCID: PMCPMC3020982
24. Youn JC, Lee DY, Jhoo JH, Kim KW, Choo IH, Woo JI. Prevalence of neuropsychiatric syndromes in Alzheimer's disease (AD). *Arch Gerontol Geriatr.* 2011; 52(3): 258–63. doi: [10.1016/j.archger.2010.04.015](https://doi.org/10.1016/j.archger.2010.04.015) PMID: [20537736](https://pubmed.ncbi.nlm.nih.gov/20537736/)
25. Lang CJ, Leuschner T, Ulrich K, Stössel C, Heckmann JG, Hummel T. Taste in dementing diseases and parkinsonism. *J Neurol Sci.* 2006; 248(1–2): 177–84. doi: [10.1016/j.jns.2006.05.020](https://doi.org/10.1016/j.jns.2006.05.020) PMID: [16769086](https://pubmed.ncbi.nlm.nih.gov/16769086/)
26. Schiffman SS, Graham BG, Sattely-Miller EA, Zervakis J, Welsh-Bohmer K. Taste, smell and neuropsychological performance of individuals at familial risk for Alzheimer's disease. *Neurobiol Aging.* 2002; 23(3): 397–404. PMID: [11959402](https://pubmed.ncbi.nlm.nih.gov/11959402/)
27. Steinbach S, Hundt W, Vaitl A, Heinrich P, Förster S, Bürger K, et al. Taste in mild cognitive impairment and Alzheimer's disease. *J Neurol.* 2010; 257(2): 238–46. doi: [10.1007/s00415-009-5300-6](https://doi.org/10.1007/s00415-009-5300-6) PMID: [19727902](https://pubmed.ncbi.nlm.nih.gov/19727902/)

28. Humbert IA, McLaren DG, Kosmatka K, Fitzgerald M, Johnson S, Porcaro E, et al. Early deficits in cortical control of swallowing in Alzheimer's disease. *J Alzheimers Dis.* 2010; 19(4): 1185–97. doi: [10.3233/JAD-2010-1316](https://doi.org/10.3233/JAD-2010-1316) PMID: [20308785](https://pubmed.ncbi.nlm.nih.gov/20308785/); PubMed Central PMCID: PMC2891325
